# Supplementary material
Source: publisher figshare collection journal article supplement (https://gsapubs.figshare.com/articles/dataset/_/19694485)
Supplement: Supplementary file 1 [file 1]

Jie Li, Chen Wu, Xuanhua Chen, Andrew V. Zuza, Peter J. Haproff, An Yin, and Zhaogang Shao, 2022, Tectonic evolution of the Beishan orogen in central Asia: Subduction, accretion, and continent-continent collision during the closure of the Paleo-Asian Ocean: GSA Bulletin, <https://doi.org/10.1130/B36451.1>.

## Supplemental Material

**Table S1.** LA-ICP-MS results for zircon U–Pb ages of igneous samples from this study.

**Table S2.** Major and trace elements for magmatic intrusion samples from this study.

**Table S3.** Summary of geochronology results of intrusive rocks of the Beishan region.

**Table S4.** Summary of geochemistry data of intrusive rocks of the Beishan region.

**Table S5.** Summary of whole-rock Sr–Nd isotopic geochemistry data of intrusive rocks of the Beishan region.

**Table S6.** Summary of zircon Hf isotopic data of intrusive rocks of the Beishan region.
